# Supplementary material for: Downscaling land use and land cover from the Global Change Assessment Modelfor coupling with Earth system models
Source: Copernicus journal article supplement (doi:10.5194/gmd-9-3055-2016), 2016-09-02
Supplement: Supplementary file 1 [file gmd-9-3055-2016-supplement.pdf]

Supplement of Geosci. Model Dev., 9, 3055–3069, 2016  
<http://www.geosci-model-dev.net/9/3055/2016/>  
doi:10.5194/gmd-9-3055-2016-supplement  
© Author(s) 2016. CC Attribution 3.0 License.

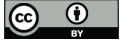

*Supplement of*

## **Downscaling land use and land cover from the Global Change Assessment Model for coupling with Earth system models**

**Yannick Le Page et al.**

*Correspondence to:* Yannick Le Page (niquya@gmail.com)

The copyright of individual parts of the supplement might differ from the CC-BY 3.0 licence.

## A. GCAM overview

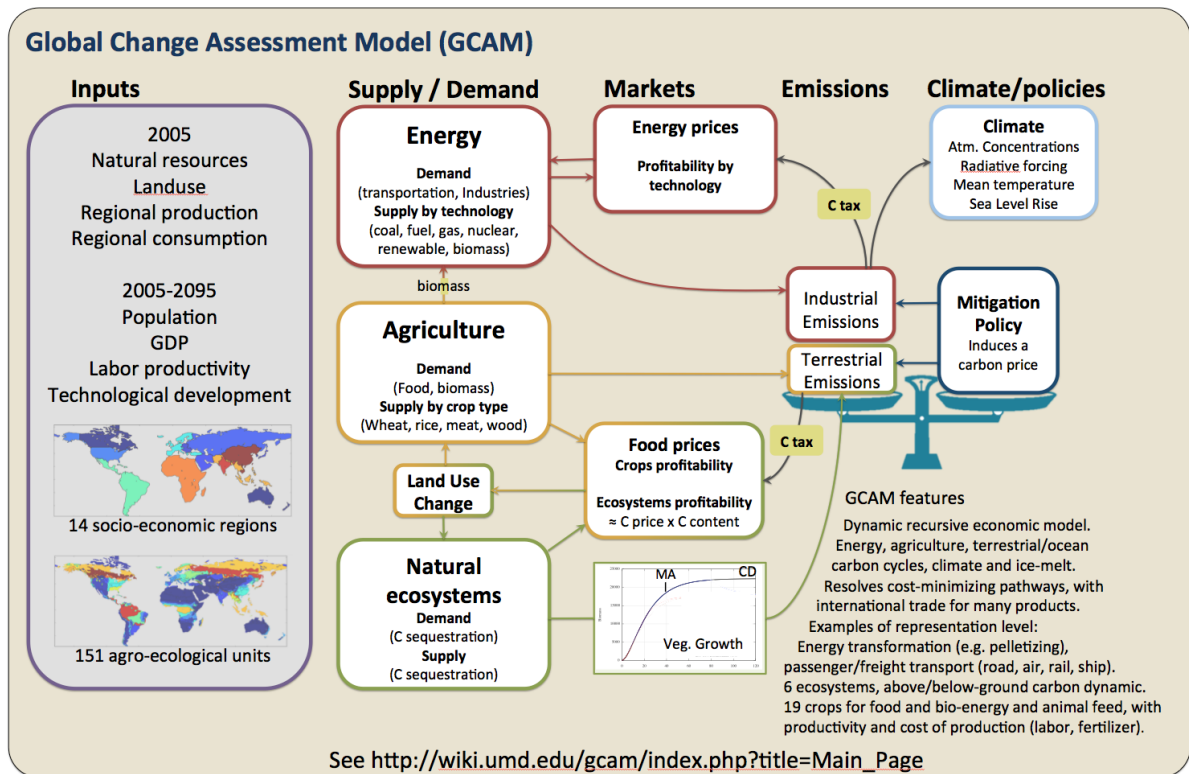

Figure S1. GCAM diagram.

## B. Evaluation of the downscaling for forests

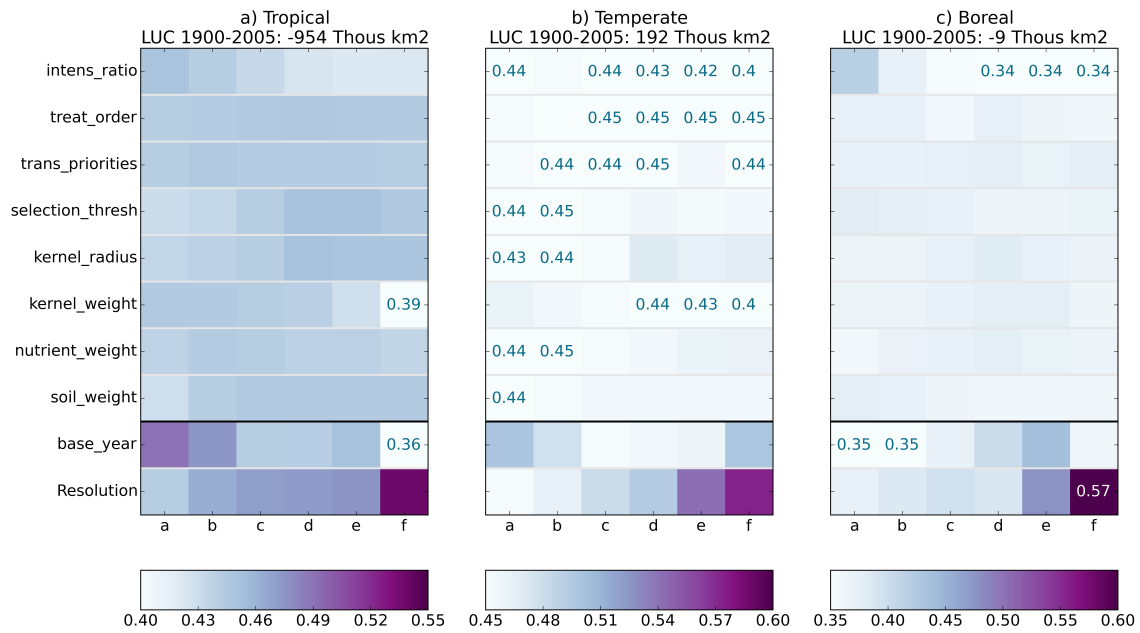

Figure S2. Results of the performance and sensitivity analysis for forests.

## C. Configuration to downscale 4 types of forests, instead of one single forest type

Table S1: User-defined aggregation of the spatial data to downscale 4 types of forests separately. ENF: Evergreen needle-leaf forest; EBF: Evergreen broadleaf forest; DNF: Deciduous needle-leaf forest; DBF: Deciduous broadleaf forest.

| Spatial land types<br>(MODIS PFTs) | Final land types (FLT) for downscaling |          |          |          |          |          |          |          |          |          |
|------------------------------------|----------------------------------------|----------|----------|----------|----------|----------|----------|----------|----------|----------|
|                                    | ENF                                    | EBF      | DNF      | DBF      | shrub    | grass    | crops    | urban    | snow     | sparse   |
| ev. needl. (ENF)                   | <b>1</b>                               | 0        | 0        | 0        | 0        | 0        | 0        | 0        | 0        | 0        |
| ev. broad. (EBF)                   | 0                                      | <b>1</b> | 0        | 0        | 0        | 0        | 0        | 0        | 0        | 0        |
| dec. needl. (DNF)                  | 0                                      | 0        | <b>1</b> | 0        | 0        | 0        | 0        | 0        | 0        | 0        |
| dec. broad. (DBF)                  | 0                                      | 0        | 0        | <b>1</b> | 0        | 0        | 0        | 0        | 0        | 0        |
| shrub                              | 0                                      | 0        | 0        | 0        | <b>1</b> | 0        | 0        | 0        | 0        | 0        |
| grass                              | 0                                      | 0        | 0        | 0        | 0        | <b>1</b> | 0        | 0        | 0        | 0        |
| crops                              | 0                                      | 0        | 0        | 0        | 0        | 0        | <b>1</b> | 0        | 0        | 0        |
| urban                              | 0                                      | 0        | 0        | 0        | 0        | 0        | 0        | <b>1</b> | 0        | 0        |
| snow                               | 0                                      | 0        | 0        | 0        | 0        | 0        | 0        | 0        | <b>1</b> | 0        |
| sparse                             | 0                                      | 0        | 0        | 0        | 0        | 0        | 0        | 0        | 0        | <b>1</b> |

**Table S2: User-defined aggregation of the GCAM data to downscale 4 types of forests separately. ENF: Evergreen needle-leaf forest; EBF Evergreen broadleaf forest; DNF: Deciduous needle-leaf forest; DBF: Deciduous broadleaf forest.**

| GCAM land types  | Final land types (FLT) for downscaling |     |     |     |       |       |       |       |      |        |
|------------------|----------------------------------------|-----|-----|-----|-------|-------|-------|-------|------|--------|
|                  | ENF                                    | EBF | DNF | DBF | shrub | grass | crops | urban | snow | sparse |
| Corn             | 0                                      | 0   | 0   | 0   | 0     | 0     | 1     | 0     | 0    | 0      |
| Wheat            | 0                                      | 0   | 0   | 0   | 0     | 0     | 1     | 0     | 0    | 0      |
| Rice             | 0                                      | 0   | 0   | 0   | 0     | 0     | 1     | 0     | 0    | 0      |
| Root_Tuber       | 0                                      | 0   | 0   | 0   | 0     | 0     | 1     | 0     | 0    | 0      |
| OilCrop          | 0                                      | 0   | 0   | 0   | 0     | 0     | 1     | 0     | 0    | 0      |
| SugarCrop        | 0                                      | 0   | 0   | 0   | 0     | 0     | 1     | 0     | 0    | 0      |
| OtherGrain       | 0                                      | 0   | 0   | 0   | 0     | 0     | 1     | 0     | 0    | 0      |
| FiberCrop        | 0                                      | 0   | 0   | 0   | 0     | 0     | 1     | 0     | 0    | 0      |
| FodderGrass      | 0                                      | 0   | 0   | 0   | 0     | 0     | 1     | 0     | 0    | 0      |
| FodderHerb       | 0                                      | 0   | 0   | 0   | 0     | 0     | 1     | 0     | 0    | 0      |
| Biomass          | 0                                      | 0   | 0   | 0   | 0     | 0     | 1     | 0     | 0    | 0      |
| MiscCrop         | 0                                      | 0   | 0   | 0   | 0     | 0     | 1     | 0     | 0    | 0      |
| OtherArableLand  | 0                                      | 0   | 0   | 0   | 0     | 0     | 1     | 0     | 0    | 0      |
| PalmFruit        | 0                                      | 0   | 0   | 0   | 0     | 0     | 1     | 0     | 0    | 0      |
| Pasture          | 0                                      | 0   | 0   | 0   | 0     | 1     | 0     | 0     | 0    | 0      |
| UnmanagedPasture | 0                                      | 0   | 0   | 0   | 0     | 1     | 0     | 0     | 0    | 0      |
| UrbanLand        | 0                                      | 0   | 0   | 0   | 0     | 0     | 0     | 1     | 0    | 0      |
| willow           | 1                                      | 1   | 1   | 1   | 0     | 0     | 0     | 0     | 0    | 0      |
| Forest           | 1                                      | 1   | 1   | 1   | 0     | 0     | 0     | 0     | 0    | 0      |
| UnmanagedForest  | 1                                      | 1   | 1   | 1   | 0     | 0     | 0     | 0     | 0    | 0      |
| Shrubland        | 0                                      | 0   | 0   | 0   | 1     | 0     | 0     | 0     | 0    | 0      |
| Grassland        | 0                                      | 0   | 0   | 0   | 0     | 1     | 0     | 0     | 0    | 0      |
| Tundra           | 0                                      | 0   | 0   | 0   | 0     | 1     | 0     | 0     | 0    | 0      |
| RockIceDesert    | 0                                      | 0   | 0   | 0   | 0     | 0     | 0     | 0     | 1    | 1      |

**Table S3: User-defined treatment order to downscale 4 types of forests separately. ENF: Evergreen needle-leaf forest; EBF Evergreen broadleaf forest; DNF: Deciduous needle-leaf forest; DBF: Deciduous broadleaf forest.**

| Final land types (FLT) | Treatment order |
|------------------------|-----------------|
| ENF                    | 5               |
| EBF                    | 6               |
| DNF                    | 7               |
| DBF                    | 8               |
| shrub                  | 10              |
| grass                  | 9               |
| crops                  | 4               |
| urban                  | 1               |
| snow                   | 2               |
| sparse                 | 3               |

**Table S4: User-defined transition priorities to downscale 4 types of forests separately. ENF: Evergreen needle-leaf forest; EBF Evergreen broadleaf forest; DNF: Deciduous needle-leaf forest; DBF: Deciduous broadleaf forest.**

| Final land types (FLTs) | Final land types (FLTs) for downscaling |     |     |     |       |       |       |       |      |        |
|-------------------------|-----------------------------------------|-----|-----|-----|-------|-------|-------|-------|------|--------|
|                         | ENF                                     | EBF | DNF | DBF | shrub | grass | crops | urban | snow | sparse |
| ENF                     | 0                                       | 1   | 2   | 3   | 4     | 5     | 6     | 7     | 8    | 9      |
| EBF                     | 1                                       | 0   | 2   | 3   | 4     | 5     | 6     | 7     | 8    | 9      |
| DNF                     | 1                                       | 2   | 0   | 3   | 4     | 5     | 6     | 7     | 8    | 9      |
| DBF                     | 1                                       | 2   | 3   | 0   | 4     | 5     | 6     | 7     | 8    | 9      |
| shrub                   | 5                                       | 6   | 7   | 8   | 0     | 4     | 9     | 1     | 3    | 2      |
| grass                   | 6                                       | 7   | 8   | 9   | 5     | 0     | 4     | 1     | 3    | 2      |
| crops                   | 4                                       | 5   | 6   | 7   | 3     | 2     | 0     | 1     | 9    | 8      |
| urban                   | 5                                       | 6   | 7   | 8   | 3     | 2     | 4     | 0     | 9    | 1      |
| snow                    | 6                                       | 7   | 8   | 9   | 5     | 4     | 3     | 2     | 0    | 1      |
| sparse                  | 6                                       | 7   | 8   | 9   | 4     | 2     | 3     | 5     | 1    | 0      |
